# Supplementary material for: Enhanced Field-Effect Control of Single-Layer WS2 Optical Features by hBN Full Encapsulation
Source: MDPI journal article supplement (doi:10.3390/nano12244425), 2022-12-12
Supplement: s1 [file s1]

# Supporting Information

## Enhanced Field-Effect Control of Single-Layer WS<sub>2</sub> Optical Features by hBN Full Encapsulation

Anna Di Renzo <sup>1,2</sup>, Onur Çakıroğlu <sup>3</sup>, Felix Carrascoso <sup>3</sup>, Hao Li <sup>3</sup>, Giuseppe Gigli <sup>1,2</sup>, Kenji Watanabe <sup>4</sup>, Takashi Taniguchi <sup>5</sup>, Carmen Munuera <sup>3</sup>, Aurora Rizzo <sup>2</sup>, Andres Castellanos-Gomez <sup>3,\*</sup>, Rosanna Mastria <sup>2,\*</sup> and Riccardo Frisenda <sup>3,6,\*</sup>

<sup>1</sup> Department of Mathematics and Physics “Ennio De Giorgi”, University of Salento, Via Arnesano, 73100 Lecce, Italy; anna.direnzo@unisalento.it (A.D.R.); giuseppe.gigli@unisalento.it (G.G.)

<sup>2</sup> National Research Council, Institute of Nanotechnology (CNR-NANOTEC), Via Monteroni, 73100 Lecce, Italy; aurora.rizzo@nanotec.cnr.it

<sup>3</sup> Materials Science Factory, Instituto de Ciencia de Materiales de Madrid (ICMM-CSIC), E-28049 Madrid, Spain; onur.cakiroglu@csic.es (O.Ç.); felix.c@csic.es (F.C.); lihao-zzu@outlook.com (H.L.); cmunuera@icmm.csic.es (C.M.)

<sup>4</sup> Research Center for Functional Materials, National Institute for Materials Science, 1-1 Namiki, Tsukuba 305-0044, Japan; watanabe.kenji.aml@nims.go.jp

<sup>5</sup> International Center for Materials Nanoarchitectonics, National Institute for Materials Science, 1-1 Namiki, Tsukuba 305-0044, Japan; taniguchi.takashi@nims.go.jp

<sup>6</sup> Physics Department, Sapienza University of Rome, Piazzale Aldo Moro 5, 00185 Rome, Italy

\* Correspondence: andres.castellanos@csic.es (A.C.-G.), rosanna.mastria@nanotec.cnr.it (R.M.); riccardo.frisenda@uniroma1.it (R.F.)

### Sample fabrication

Single-layer WS<sub>2</sub> and few-layer hBN flakes were mechanically exfoliated from bulk crystals with Nitto SPV 224 tape and transferred onto the surface of a Gel-Film (Gel-Pak WF ×4 6.0 mil) substrate. Then single-layer flakes of WS<sub>2</sub> were identified on the PDMS stamp with an optical microscope operated in transmission mode<sup>1</sup> and their thickness confirmed by differential reflectance.

Synthetic bulk WS<sub>2</sub> crystals were purchased from HQ Graphene.

Bulk hBN crystals were grown by K. Watanabe and T. Taniguchi.<sup>2</sup>

### Raman characterization of the sample

Figure S1 shows the Raman signals coming from single-layer WS<sub>2</sub> (between 200 cm<sup>-1</sup> and 500 cm<sup>-1</sup>) and hBN (between 1200 cm<sup>-1</sup> and 1500 cm<sup>-1</sup>). The top panels have been recorded on bare WS<sub>2</sub> and bare hBN regions while the bottom panels have been measured in the hBN/WS<sub>2</sub>/hBN stack region. The spectra collected on the WS<sub>2</sub> monolayer show typical Raman feature for this 2D material.<sup>3</sup> For laser excitation of 532 nm, the Raman spectrum is dominated by the 2LA mode at ~ 352 cm<sup>-1</sup>, E<sub>12g</sub> at ~356 cm<sup>-1</sup> and A<sub>1g</sub> at ~ 418 cm<sup>-1</sup>.

Regarding hBN, the Raman spectrum is dominated by E<sub>2g</sub> peak at 1362 cm<sup>-1</sup>.

### Gate dependent differential reflectance spectroscopy:

In order to verify the tunability of the optical properties by means of the electric-field, preliminary gate-dependent differential reflectance measurements were carried out on the devices.

For this measurements, the device is mounted under the objective of an optical microscope (Motic BA310 Met-T) system supplemented with a homebuilt micro-reflectance module based on a fiber- coupled CCD spectrometer (CCS200/M, Thorlabs).<sup>4</sup> The differential reflectance spectrum was calculated as  $(R - R_0)/R$ , where  $R$  is the intensity reflected by the flake,  $R_0$  the intensity reflected by the substrate.<sup>5</sup> The absorbance spectra show two main peak features at 2.02 eV and 2.4 eV, respectively associated to direct band gap transitions at the K point of the Brillouin zone that generates excitons labelled A and B,<sup>6</sup> but Figure S2 focuses mainly on the characteristics of exciton A, which is also prominent in photoluminescence.<sup>7</sup>

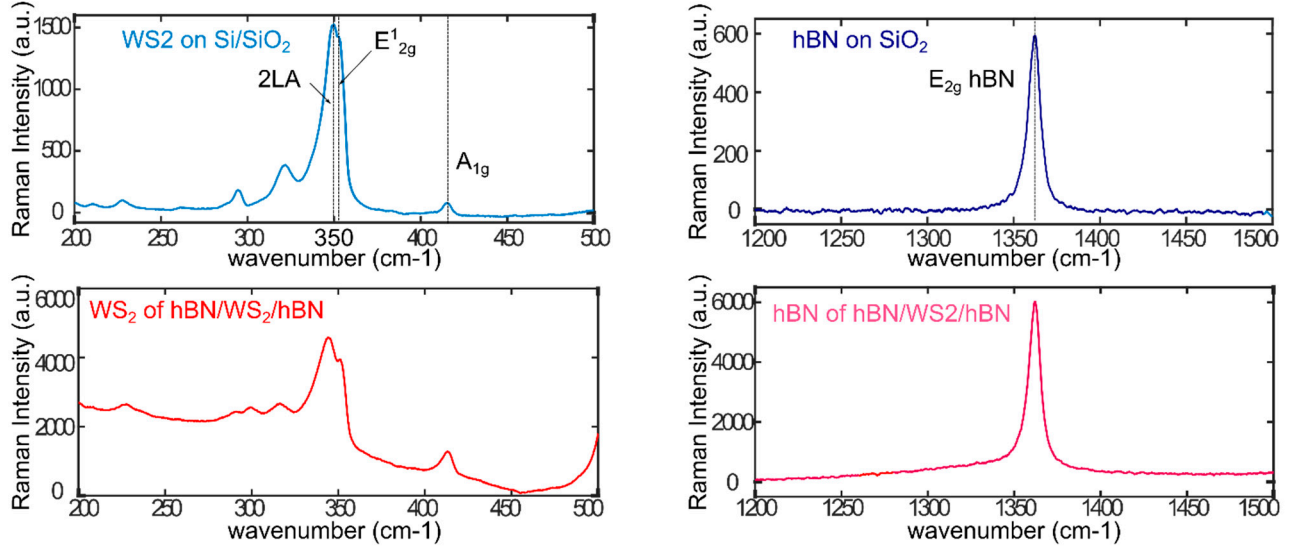

**Figure S1.** Room-temperature Raman spectra from the unencapsulated monolayer WS<sub>2</sub> region (top left), from the bottom hBN (top right) and from the hBN/WS<sub>2</sub>/hBN stack region (bottom left and bottom right), using a 532 nm laser excitation. The main peaks due to WS<sub>2</sub> and hBN have been labeled.

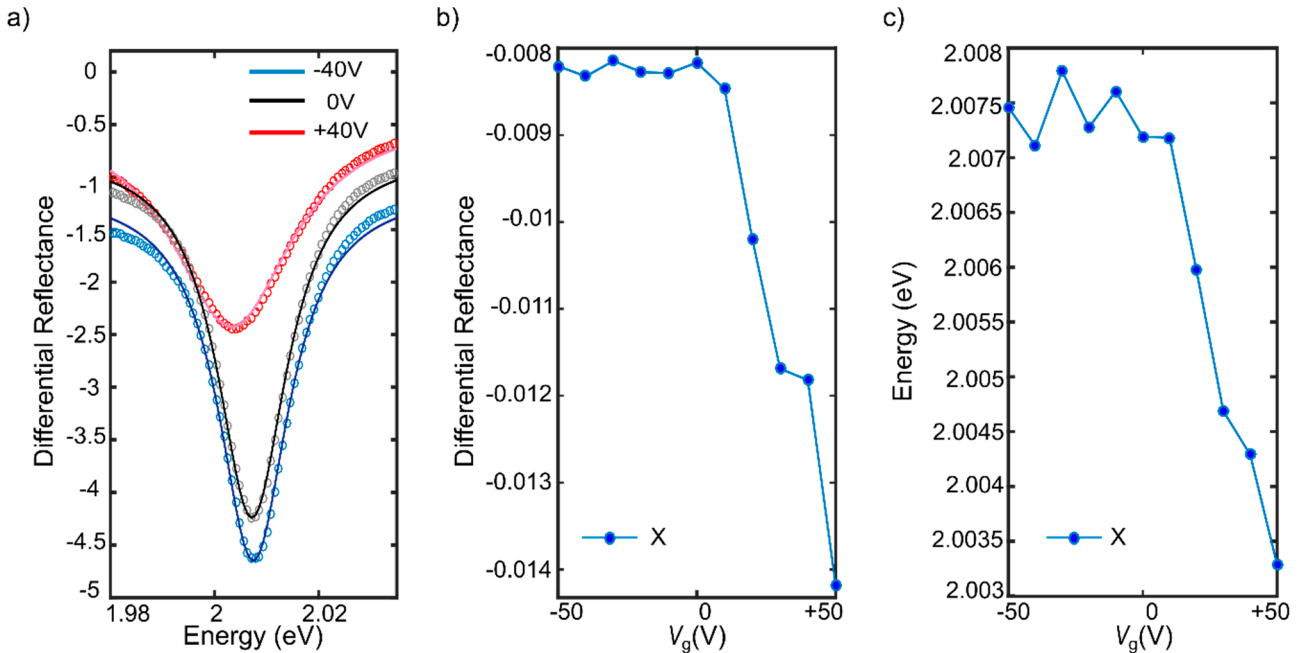

**Figure S2.** (a) Differential Reflectance spectra of the 1L-WS<sub>2</sub> sample at the back-gate voltages between -40V and 40 V. (b) Differential reflectance intensity of the A peak versus gate voltage. (c) Gate-dependent optical hysteresis the for A peak differential reflectance intensity in 1L-WS<sub>2</sub> FET.

Figure S2a shows the differential reflectance spectra of WS<sub>2</sub> FET under gate voltages, namely -40 V, 0 V and 40 V. We observed an overall reduction of the optical absorbance in correspondance of the A peak by increasing electron doping. Moreover, this effect is also accompanied by a red shift of the main peak. Fig S2b shows, the intensity variation of the peak as a function of voltage ranging from -40 V and 40 V with a step voltage of 10 V. We also observed the hysteresis behaviour in the differential reflectance performing a full gate sweep from -50 V to 50 V (Figure S2c). It is worth to note that was not possible to appreciate a reflectance signal on the WS<sub>2</sub> single-layer encapsulated with hBN, due to thin film destruvtive interference related to the thicknesses of hBN and SiO<sub>2</sub> that strongly influence the visibility of exciton resonances in absorption measurements.<sup>8</sup>

## References

- <sup>1</sup> N.S. Taghavi, P. Gant, P. Huang, I. Niehues, R. Schmidt, S. Michaelis de Vasconcellos, R. Bratschitsch, M. García-Hernández, R. Frisenda, and A. Castellanos-Gomez, *Nano Research* **12**, 1691 (2019).
- <sup>2</sup> T.Taniguchi & K. Watanabe *J. Cryst. Growth* **303**, 525 (2007).
- <sup>3</sup> Berkdemir, A.; Gutiérrez, H.R.; Botello-Méndez, A.R.; Perea-López, N.; Elías, A.L.; Chia, C.I.; Wang, B.; Crespi, V.H.; López-Urías, F.; Charlier, J.C.; et al.. *Sci Rep* 2013, **3**, doi:10.1038/srep01755.
- <sup>4</sup>Y. Niu, S. Gonzalez-Abad, R. Frisenda, P. Marauhn, M. Drüppel, P. Gant, R. Schmidt, N.S. Taghavi, D. Barcons, A.J. Molina-Mendoza, S.M. de Vasconcellos, R. Bratschitsch, D.P. de Lara, M. Rohlfing, and A. Castellanos-Gomez, *Nanomaterials* **8**, 725(2018).
- <sup>5</sup>A. Castellanos-Gomez, J. Quereda, H.P. van der Meulen, N. Agraït, and G. Rubio-Bollinger, *Nanotechnology* **27**, 115705(2016).
- <sup>6</sup> A. Splendiani, L. Sun, Y. Zhang, T. Li, J. Kim, C.Y. Chim, G. Galli, and F. Wang, *Nano Letters* **10**, 1271 (2010).
- <sup>7</sup> W. Zhao, Z. Ghorannevis, L. Chu, M. Toh, C. Kloc, P.H. Tan, and G. Eda, *ACS Nano* **7**, 791 (2013).
- <sup>8</sup> S. Shree, I. Paradisanos, X. Marie, C. Robert, and B. Urbaszek, *Nature Reviews Physics* **3**, 39 (2021).
